# Supplementary material for: Five undervalued edible species inherent to autumn-winter season: nutritional composition, bioactive constituents and volatiles profile
Source: PeerJ. 2021 Nov 23;9:e12488. doi: 10.7717/peerj.12488 (PMC8621719; doi:10.7717/peerj.12488)
Supplement: Supplemental Information 4 [file peerj-09-12488-s004.xlsx]

## Sheet: Hoja1
	Benzenoides	Organoheterocyclic compounds	Monoterpenoids	Medium-chain aldehydes	Fatty alcohols	Alcohols and polyols	Sesquiterpenoids	Pyrazines	Enones	Organooxygen compounds o norcarotenoids	TOTAL (100%)
T. majus (CA)	4287372498	22375781	275197964	111263580	91622446	7852352	8423089	0	21869975	28506328
	3928192334	10047574	240397801	53376580	17402016	0	7171310	0	7772546	11491721
promedio	4107782416	1.62117e+07	2.57798e+08	82320080	54512231	7852352	7.7972e+06	0	1.48213e+07	1.9999e+07	4.56909e+09
S. media (PA)	325323052	7.0505e+06	253471256	329825614	105643385	15976537	111015957	0	167972974	53761604
	320611803	8.8792e+06	295662544	506552606	89334426	7215778	163212727	0	158888947	67571161
promedio	3.22967e+08	7.96485e+06	274566900	418189110	9.74889e+07	1.15962e+07	137114342	0	1.63431e+08	6.06664e+07	1493985037
S. oleraceus (CE)	507426005	5626611	136980652	472970372	349586143	14447294	25507901	0	22837868	20774613
	1089400074	9290779	286053774	841152156	769331208	29078898	45927190	0	51743295	49820434
promedio	7.98413e+08	7458695	211517213	657061264	5.59459e+08	21763096	3.57175e+07	0	3.72906e+07	3.52975e+07	2.36398e+09
C. album (SN)	221344298	4.62368e+06	200718256	1495648426	368207641	19786691	11205487	0	71781153	22030628
	247066115	4.78003e+06	218464428	1305356010	230318314	20836219	28841293	0	95026688	27746399
promedio	2.34205e+08	4.70185e+06	209591342	1400502218	2.99263e+08	20311455	20023390	0	8.34039e+07	2.48885e+07	2.29689e+09
D. erucoides (WA)	9314990149	8088138	100113192	353744729	132325015	4820122	78296245	34959626	120119855	37878041
	15784866727	14626002	316167347	946431383	395418238	1784748	109586780	115848135	1644195191	71680911
promedio	12549928438	11357070	2.0814e+08	650088056	2.63872e+08	3302435	9.39415e+07	7.54039e+07	882157523	54779476	14792970287
		T. majus L.	S. media L.	S. oleraceus	C. album L.	D. erucoides
	Benzenoids	4107782416	3.22967e+08	7.98413e+08	2.34205e+08	12549928438
	Organoheterocyclic compounds	1.62117e+07	7.96485e+06	7458695	4.70185e+06	11357070
	Monoterpenoids	2.57798e+08	274566900	211517213	209591342	2.0814e+08
	Medium-chain aldehydes	82320080	418189110	657061264	1400502218	650088056
	Fatty alcohols	54512231	9.74889e+07	5.59459e+08	2.99263e+08	2.63872e+08
	Alcohols and polyols	7852352	1.15962e+07	21763096	20311455	3302435
	Sesquiterpenoids	7.7972e+06	137114342	3.57175e+07	20023390	9.39415e+07
	Pyrazines	0	0	0	0	7.54039e+07
	Ketones	1.48213e+07	1.63431e+08	3.72906e+07	8.34039e+07	882157523
	Organooxygen compounds	1.9999e+07	6.06664e+07	3.52975e+07	2.48885e+07	54779476
	1	4.56909e+09	1493985037	2.36398e+09	2.29689e+09	14792970287
		T. majus L.	S. media L.	S. oleraceus	C. album L.	D. erucoides
	Benzenoids	89.9037	21.6178	33.7741	10.1966	84.8371
	Organoheterocyclic compounds	0.354812	0.533128	0.315515	0.204705	0.0767734
	Monoterpenoids	5.64221	18.3782	8.94751	9.125	1.40702
	Medium-chain aldehydes	1.80167	27.9915	27.7947	60.9738	4.39457
	Fatty alcohols	1.19306	6.52543	23.666	13.029	1.78376
	Alcohols and polyols	0.171858	0.77619	0.920613	0.884302	0.0223244
	Sesquiterpenoids	0.170651	9.17776	1.51091	0.871761	0.635042
	Pyrazines	0	0	0	0	0.509728
	Enones	0.324381	10.9393	1.57745	3.63117	5.96336
	Organooxygen compounds	0.437702	4.06071	1.49314	1.08357	0.370307
		100	100	100	100	100
